# Supplementary material
Source: PubMed Central journal article supplement (PMC2562356)
Supplement: NIHMS58760-supplement-2.pdf [file NIHMS58760-supplement-2.pdf]

**Supplementary Table 1.**

Genes within the gemcitabine/AraC transport, metabolism and target pathway.

| <b>HUGO Name</b> | <b>Gene Name</b>                              | <b>Chromosomal Location</b> |
|------------------|-----------------------------------------------|-----------------------------|
| <i>DCK</i>       | Deoxycytidine kinase                          | 4q13.3-q21.1                |
| <i>CMPK</i>      | Cytidylate kinase                             | 1p32                        |
| <i>CDA</i>       | Cytidine deaminase                            | 1p36.2-p35                  |
| <i>DCTD</i>      | dCMP deaminase                                | 4q35.1                      |
| <i>RRM1</i>      | Ribonucleotide reductase M1                   | 11p15.5                     |
| <i>RRM2</i>      | Ribonucleotide reductase M2                   | 2p25-p24                    |
| <i>RRM2B</i>     | Ribonucleotide reductase M2B (TP53 inducible) | 8q23.1                      |
| <i>SLC28A1</i>   | Solute carrier family 28 member 1             | 15q25-26                    |
| <i>SLC28A2</i>   | Solute carrier family 28 member 2             | 15q15                       |
| <i>SLC28A3</i>   | Solute carrier family 28 member 3             | 9q22.2                      |
| <i>SLC29A1</i>   | Solute carrier family 29 member 1             | 6q21.1-p21.2                |
| <i>SLC29A2</i>   | Solute carrier family 29 member 2             | 11q13                       |
| <i>NT5C1A</i>    | 5'-nucleotidase, Cytosolic IA                 | 1p34.3-p33                  |
| <i>NT5C1B</i>    | 5'-nucleotidase, Cytosolic IB                 | 2p24.2                      |
| <i>NT5C2</i>     | 5'-nucleotidase, Cytosolic II                 | 10q24.32-q24.33             |
| <i>NT5C3</i>     | 5'-nucleotidase, Cytosolic III                | 7p14.3                      |
| <i>NT5C</i>      | 5'-nucleotidase, cytosolic                    | 17q25.1                     |

**Supplementary Table 2. Top three pathway networks for candidate genes.**

**Gemcitabine**

| Gene                                                           | ProbeSet ID  | P-value  | ChromLocation   | Gene Description                                                 | RefSeq Transcript ID                                |
|----------------------------------------------------------------|--------------|----------|-----------------|------------------------------------------------------------------|-----------------------------------------------------|
| <b>Cancer, Cell Death, Reproductive System Disease</b>         |              |          |                 |                                                                  |                                                     |
| ARHGEF12                                                       | 201334_s_at  | 7.67E-06 | chr11q23.3      | Rho guanine nucleotide exchange factor (GEF) 12                  | NM_152910 /// NM_178009                             |
| CABLES1                                                        | 225532_at    | 3.45E-05 | chr8q21.2       | Cdk5 and Abl enzyme substrate 1                                  | NM_001006109 /// NM_020187                          |
| ESR2                                                           | 211118_x_at  | 3.61E-07 | chr14q23.2      | estrogen receptor 2 (ER beta)                                    | NM_003496                                           |
| GNLY                                                           | 205495_s_at  | 2.17E-06 | chr5q21         | granulysin                                                       | NM_001042539 /// NM_002383                          |
| GNLY                                                           | 37145_at     | 3.47E-06 | chr4q34         | granulysin                                                       | NM_030797                                           |
| H2AFX                                                          | 212525_s_at  | 2.82E-05 | chr1p31.1       | H2A histone family, member X                                     | NM_005116 /// NM_203327                             |
| LAMA3                                                          | 203726_s_at  | 2.04E-09 | chr4q32.1       | laminin, alpha 3                                                 | NM_004475                                           |
| MAP4K4                                                         | 206571_s_at  | 2.57E-06 | chr2q11.2-q12   | mitogen-activated protein kinase kinase kinase kinase 4          | NM_014615                                           |
| MAP4K4                                                         | 218181_s_at  | 5.29E-06 | chr2q11.2-q12   | mitogen-activated protein kinase kinase kinase kinase 4          | NM_005702                                           |
| MAZ                                                            | 207824_s_at  | 6.06E-05 | chr16p11.2      | MYC-associated zinc finger protein                               | NM_002105                                           |
| MGMT                                                           | 204880_at    | 1.30E-06 | chr10q26        | O-6-methylguanine-DNA methyltransferase                          | NM_002719 /// NM_178586 /// NM_178587 /// NM_178588 |
| PPP2R5C                                                        | 213305_s_at  | 3.04E-06 | chr1q24.1       | protein phosphatase 2, regulatory subunit B (B56), gamma isoform | NM_001079874 /// NM_006113                          |
| PPP2R5C                                                        | 1554365_a_at | 6.74E-06 | chr14q32        | protein phosphatase 2, regulatory subunit B (B56), gamma isoform | NM_014520                                           |
| TLE4                                                           | 233575_s_at  | 3.11E-06 | chr7q21.1       | transducin-like enhancer of split 4 (E(sp1) homolog, Drosophila) | NM_138375                                           |
| TRAK2                                                          | 202124_s_at  | 5.08E-06 | chr9q21.31      | amyotrophic lateral sclerosis 2                                  | NM_013286                                           |
| TRRAP                                                          | 202642_s_at  | 8.85E-06 | chr2q33         | transformation/transcription domain-associated protein           | NM_175907                                           |
| U2AF2                                                          | 218382_s_at  | 3.05E-06 | chr7q21.2-q22.1 | U2 (RNU2) small nuclear RNA auxiliary factor 2                   | XM_028217 /// XM_944210                             |
| VAV3                                                           | 218807_at    | 4.51E-07 | chr6p21.3       | vav 3 oncogene                                                   | NM_022917 /// NM_130793 /// NM_139235               |
| <b>Cellular Development, Cellular Growth and Proliferation</b> |              |          |                 |                                                                  |                                                     |
| BLMH                                                           | 202179_at    | 2.78E-05 | chr17q11.2      | bleomycin hydrolase                                              | NM_012417 /// NM_181671                             |
| FKBP5                                                          | 204560_at    | 4.12E-08 | chr6p21.3-p21.2 | FK506 binding protein 5                                          | NM_018380                                           |
| FKBP5                                                          | 224856_at    | 4.15E-08 | chr6p21.3-p21.2 | FK506 binding protein 5                                          | NM_006820                                           |
| IFI44                                                          | 214453_s_at  | 3.51E-05 | chr10q26.11     | interferon-induced protein 44                                    | NM_005277 /// NM_201591 /// NM_201592               |
| MFN2                                                           | 216205_s_at  | 2.91E-05 | chr1p36.22      | mitofusin 2                                                      | NM_014966 /// NM_138614 /// NM_138615               |
| MYBBP1A                                                        | 219098_at    | 5.65E-06 | chr17p13.3      | MYB binding protein (P160) 1a                                    | NM_006417                                           |
| MYBBP1A                                                        | 233803_s_at  | 3.72E-05 | chr17p13.3      | MYB binding protein (P160) 1a                                    | NM_014874                                           |
| SF3B4                                                          | 209044_x_at  | 8.29E-07 | chr13q14.3      | splicing factor 3b, subunit 4, 49kDa                             | NM_006557 /// NM_181872                             |
| SLC23A2                                                        | 211572_s_at  | 1.22E-05 | chr16q21        | solute carrier family 23 (nucleobase transporters), member 2     | NM_152437                                           |
| SLC23A2                                                        | 209237_s_at  | 1.38E-05 | chr1q12-q21     | solute carrier family 23 (nucleobase transporters), member 2     | NM_004117                                           |
| SRI                                                            | 208921_s_at  | 2.43E-05 | chr20p13        | sorcin                                                           | NM_004117                                           |

## AraC

| Gene                                                                                                | ProbeSet ID  | P-value  | ChromLocation    | Gene Description                                                                                                               | RefSeq Transcript ID                                |
|-----------------------------------------------------------------------------------------------------|--------------|----------|------------------|--------------------------------------------------------------------------------------------------------------------------------|-----------------------------------------------------|
| <b>Cancer, Cell Death, Reproductive System Disease</b>                                              |              |          |                  |                                                                                                                                |                                                     |
| APH1A                                                                                               | 1554417_s_at | 7.87E-04 | chr1p36.13-q31.3 | anterior pharynx defective 1 homolog A (C. elegans)                                                                            | NM_001077628 /// NM_016022                          |
| DAPK1                                                                                               | 203139_at    | 5.42E-04 | chr9q34.1        | death-associated protein kinase 1                                                                                              | NM_004938                                           |
| FRAT2                                                                                               | 209864_at    | 3.43E-04 | chr10q24.1       | frequently rearranged in advanced T-cell lymphomas 2<br>glycine C-acetyltransferase (2-amino-3-ketobutyrate coenzyme A ligase) | NM_012083                                           |
| GCAT                                                                                                | 205164_at    | 1.39E-04 | chr22q13.1       |                                                                                                                                | NM_014291                                           |
| HBXIP                                                                                               | 202299_s_at  | 4.48E-04 | chr1p13.3        | hepatitis B virus x interacting protein                                                                                        | NM_006402                                           |
| LRIG1                                                                                               | 211596_s_at  | 8.87E-05 | chr3p14          | leucine-rich repeats and immunoglobulin-like domains 1                                                                         | NM_015541                                           |
| MAP4K4                                                                                              | 206571_s_at  | 1.74E-04 | chr2q11.2-q12    | mitogen-activated protein kinase kinase kinase kinase 4                                                                        | NM_004834 /// NM_145686 /// NM_145687               |
| MAP4K4                                                                                              | 222547_at    | 3.98E-04 | chr2q11.2-q12    | mitogen-activated protein kinase kinase kinase kinase 4                                                                        | NM_004834 /// NM_145686 /// NM_145687               |
| PTPN13                                                                                              | 204201_s_at  | 7.35E-04 | chr4q21.3        | protein tyrosine phosphatase, non-receptor type 13                                                                             | NM_006264 /// NM_080683 /// NM_080684 /// NM_080685 |
| ROBO1                                                                                               | 213194_at    | 1.26E-04 | chr3p12          | roundabout, axon guidance receptor, homolog 1                                                                                  | NM_002941 /// NM_133631                             |
| SCC-112                                                                                             | 212140_at    | 5.45E-04 | chr4p14          | SCC-112 protein                                                                                                                | NM_015200                                           |
| SH3BGR1                                                                                             | 201311_s_at  | 2.18E-04 | chrXq13.3        | SH3 domain binding glutamic acid-rich protein like                                                                             | NM_003022                                           |
| SPG20                                                                                               | 212526_at    | 2.70E-04 | chr13q13.3       | spastic paraplegia 20, spartin (Troyer syndrome)                                                                               | NM_015087                                           |
| TLE4                                                                                                | 233575_s_at  | 1.77E-04 | chr9q21.31       | transducin-like enhancer of split 4 (Drosophila)                                                                               | NM_007005                                           |
| TPMT                                                                                                | 203672_x_at  | 1.72E-05 | chr6p22.3        | thiopurine S-methyltransferase                                                                                                 | NM_000367                                           |
| <b>Cell Signaling, DNA Replication, Recombination, and Repair, Nucleic Acid Metabolism</b>          |              |          |                  |                                                                                                                                |                                                     |
| ADRBK2                                                                                              | 204183_s_at  | 1.80E-04 | chr22q11 22q12.1 | adrenergic, beta, receptor kinase 2                                                                                            | NM_005160                                           |
| ARL2BP                                                                                              | 202092_s_at  | 8.20E-06 | chr16q13         | ADP-ribosylation factor-like 2 binding protein                                                                                 | NM_012106                                           |
| EPB41                                                                                               | 207793_s_at  | 9.27E-04 | chr1p33-p32      | erythrocyte membrane protein band 4.1                                                                                          | NM_004437 /// NM_203342 /// NM_203343               |
| ESR2                                                                                                | 211118_x_at  | 3.40E-04 | chr14q23.2       | estrogen receptor 2 (ER beta)                                                                                                  | NM_001040275 /// NM_001040276 /// NM_001437         |
| INPP5F                                                                                              | 203607_at    | 8.35E-05 | chr10q26.11      | inositol polyphosphate-5-phosphatase F                                                                                         | NM_014937 /// NM_198330 /// NM_198331               |
| LIPA                                                                                                | 201847_at    | 8.57E-04 | chr10q23.2-q23.3 | lipase A, lysosomal acid, cholesterol esterase                                                                                 | NM_000235                                           |
| MARCKS                                                                                              | 201668_x_at  | 2.95E-04 | chr6q22.2        | myristoylated alanine-rich protein kinase C substrate                                                                          | NM_002356                                           |
| MGMT                                                                                                | 204880_at    | 2.21E-04 | chr10q26         | O-6-methylguanine-DNA methyltransferase                                                                                        | NM_002412                                           |
| PDCD10                                                                                              | 210907_s_at  | 7.86E-04 | chr3q26.1        | programmed cell death 10                                                                                                       | NM_007217 /// NM_145859 /// NM_145860               |
| RAB3B                                                                                               | 205924_at    | 9.77E-04 | chr1p32-p31      | RAB3B, member RAS oncogene family                                                                                              | NM_002867                                           |
| TRRAP                                                                                               | 202642_s_at  | 1.26E-04 | chr7q21.2-q22.1  | transformation/transcription domain-associated protein                                                                         | NM_003496                                           |
| <b>Post-Translational Modification, Cell Morphology, Connective Tissue Development and Function</b> |              |          |                  |                                                                                                                                |                                                     |
| ABCF1                                                                                               | 200045_at    | 9.33E-04 | chr6p21.33       | ATP-binding cassette, sub-family F (GCN20), member 1                                                                           | NM_001025091 /// NM_001090                          |
| ATRN                                                                                                | 211852_s_at  | 2.35E-04 | chr20p13         | attractin                                                                                                                      | NM_139321 /// NM_139322                             |
| HELZ                                                                                                | 203674_at    | 1.12E-05 | chr17q24.2       | helicase with zinc finger                                                                                                      | NM_014877                                           |
| ITGB3BP                                                                                             | 205176_s_at  | 1.53E-04 | chr1p31.3        | integrin beta 3 binding protein (beta3-endonexin)                                                                              | NM_014288                                           |
| MYBBP1A                                                                                             | 219098_at    | 9.24E-06 | chr17p13.3       | MYB binding protein (P160) 1a                                                                                                  | NM_014520                                           |
| MYBBP1A                                                                                             | 233803_s_at  | 2.97E-04 | chr17p13.3       | MYB binding protein (P160) 1a                                                                                                  | NM_014520                                           |
| NDUFS4                                                                                              | 209303_at    | 2.01E-05 | chr5q11.1        | NADH dehydrogenase (ubiquinone) Fe-S protein 4                                                                                 | NM_002495                                           |
| SNX3                                                                                                | 208781_x_at  | 3.85E-04 | chr6q21          | sorting nexin 3                                                                                                                | NM_003795                                           |
| SNX3                                                                                                | 210648_x_at  | 6.78E-04 | chr6q21          | sorting nexin 3                                                                                                                | NM_003795                                           |
| TRAK2                                                                                               | 202125_s_at  | 3.37E-04 | chr2q33          | amyotrophic lateral sclerosis 2                                                                                                | NM_015049                                           |
| YLP1M1                                                                                              | 212787_at    | 2.46E-05 | chr14q24.3       | YLP motif containing 1                                                                                                         | NM_019589 /// XM_930487 /// XM_940570               |

# Supplemental Figure 1

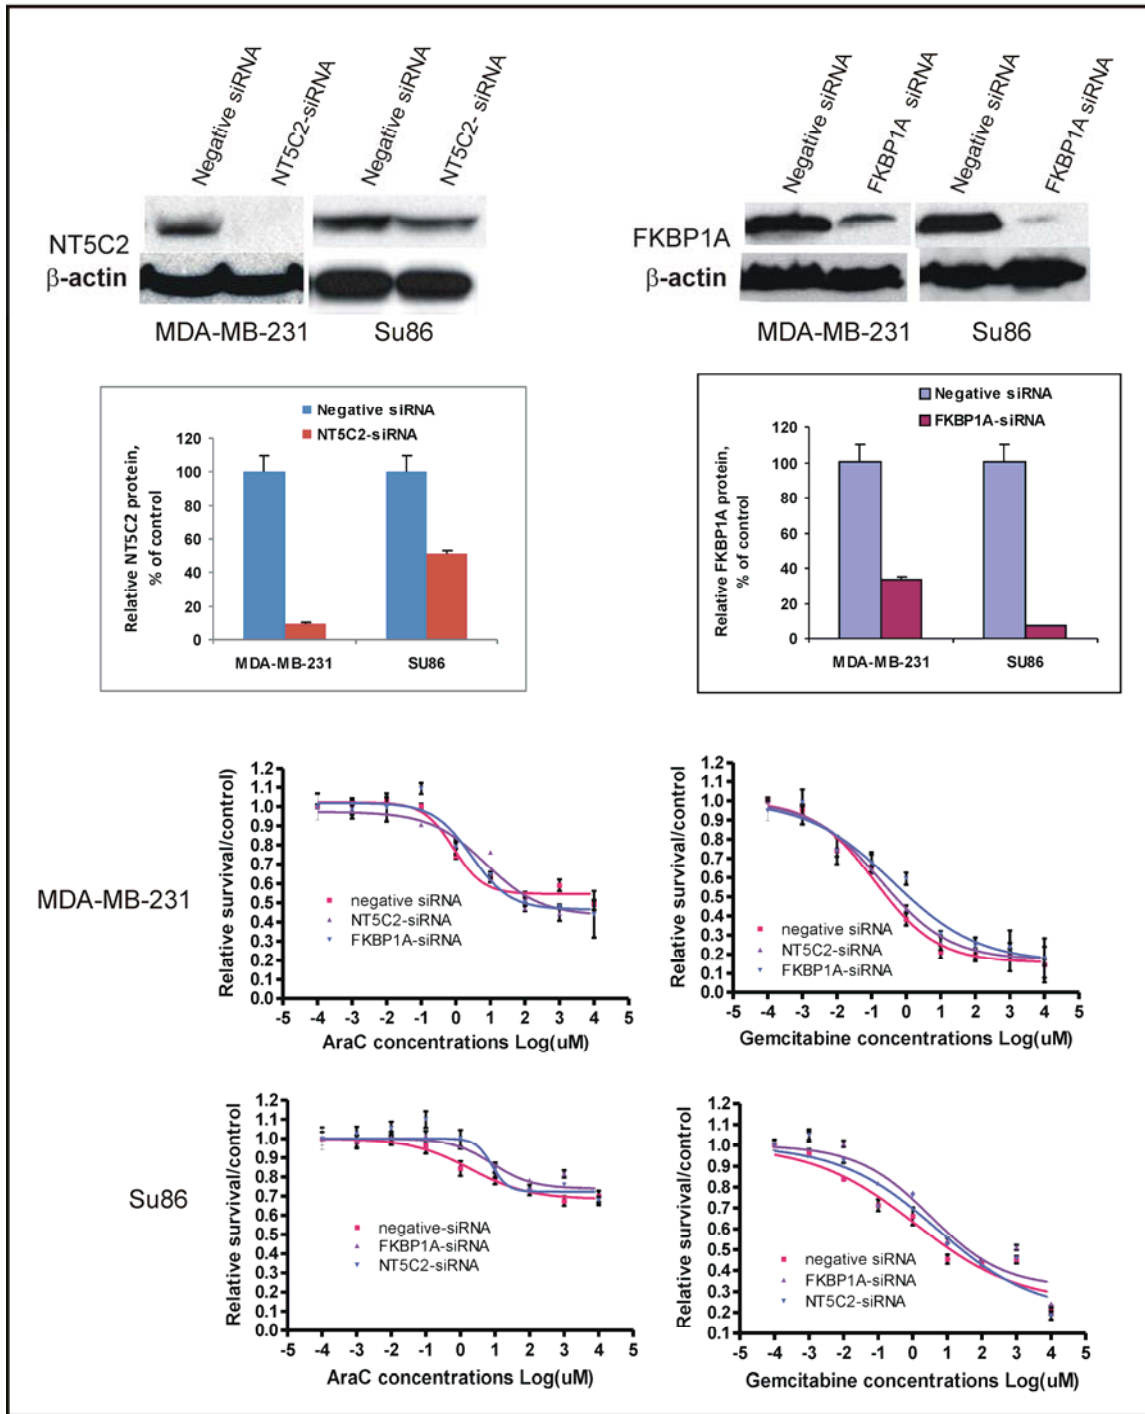

**Supplementary Figure 1.** Lack of effect of knockdown of genes that did not show an association with IC<sub>50</sub> values for gemcitabine or AraC. (A) Western blot analyses showing significantly decreased levels of NT5C2 and FKBP1A protein in MDA-MB-231 and SU86 cell lines. Error bars represent SEM values for 3 experiments. (B) SU86 and MDA-MB-231 AraC cytotoxicity. (C) SU86 and MDA-MB-231 gemcitabine cytotoxicity.
